# Supplementary material for: AI-Aided Design of Novel Targeted Covalent Inhibitors against SARS-CoV-2
Source: MDPI journal article supplement (doi:10.3390/biom12060746), 2022-05-25
Supplement: s1 [file s1]

## Supporting Materials

|       |      |                                                              |      |                   |     |                                                             |     |
|-------|------|--------------------------------------------------------------|------|-------------------|-----|-------------------------------------------------------------|-----|
| Query | 3241 | FSHSGSDLVYQPQTITSIAVLQSGFRKMAFPSSGKVEGCMVQVTCGTTTLNGLWLDVVY  | 3300 | WUHAN Viral       | 1   | SGFRKMAFPSSGKVEGCMVQVTCGTTTLNGLWLDVVY                       | 60  |
| Sbjct | 1    | SGFRKMAFPSSGKVEGCMVQVTCGTTTLNGLWLDVVY                        | 37   | SN50:A PDBID CH.. | 1   | SGFRKMAFPSSGKVEGCMVQVTCGTTTLNGLWLDVVY                       | 60  |
| Query | 3301 | CPRHVICTSEDMLNPYEDLLIRKSNHFLVQAGNVQLRVIGHSMQNCVLKLVDTAMPK    | 3360 | WUHAN Viral       | 61  | KSNHNFVQAGNVQLRVIGHSMQNCVLKLVDTANPKTPRYKRVRIQPGQTFSLVACYNG  | 120 |
| Sbjct | 38   | CPRHVICT+EDMLNPYEDLLIRKSNH+FLVQAGNVQLRVIGHSMQNC+L+LKVD+HPK   | 97   | SN50:A PDBID CH.. | 61  | KSNHNFVQAGNVQLRVIGHSMQNCVLKLVDTANPKTPRYKRVRIQPGQTFSLVACYNG  | 120 |
| Query | 3361 | TPKYKFVRIQPGQTFSLVACYNGSPSGVYQCAMRPNITKGSFLNGSCGSGVFNIDYDCV  | 3420 | WUHAN Viral       | 121 | SPSGVYQCAMRPNITKGSFLNGSCGSGVFNIDYDCVFCYMHMELPTGVHAGTDLEGK   | 180 |
| Sbjct | 98   | TPKYKFVRIQPGQTFSLVACYNGSPSGVYQCAMRPNITKGSFLNGSCGSGVFNIDYDCV  | 157  | SN50:A PDBID CH.. | 121 | SPSGVYQCAMRPNITKGSFLNGSCGSGVFNIDYDCVFCYMHMELPTGVHAGTDLEGK   | 180 |
| Query | 3421 | SFCYMHMELPTGVHAGTDLEGKFGYGFVDRQTAQAAGDTTITVNLVLAAYAVINGDR    | 3480 | WUHAN Viral       | 181 | FGYGFVDRQTAQAAGDTTITVNLVLAAYAVINGDRWFLNRFTTILNDFNLVAMKYNYE  | 240 |
| Sbjct | 158  | SFCYMHMELPTGVHAGTDLEGKFGYGFVDRQTAQAAGDTTITVNLVLAAYAVINGDR    | 217  | SN50:A PDBID CH.. | 181 | FGYGFVDRQTAQAAGDTTITVNLVLAAYAVINGDRWFLNRFTTILNDFNLVAMKYNYE  | 240 |
| Query | 3481 | WFLNRFITTLNDFNLVAMKYNYEPLTQDHVDILGPLSAQTGIAVDMCAALKELLQNGMN  | 3540 | WUHAN Viral       | 241 | PLTQDHVDILGPLSAQTGIAVDMCAALKELLQNGMGRITLGSALLEDEFTPFDDVVRQC | 300 |
| Sbjct | 218  | WFLNRFITTLNDFNLVAMKYNYEPLTQDHVDILGPLSAQTGIAVDMCAALKELLQNGMN  | 277  | SN50:A PDBID CH.. | 241 | PLTQDHVDILGPLSAQTGIAVDMCAALKELLQNGMGRITLGSALLEDEFTPFDDVVRQC | 300 |
| Query | 3541 | GRTILGSALLEDEFTPFDDVVRQCSGVTFQSGAVKRTIKGTHWLLTILTSLLVLVQSTQW | 3600 | WUHAN Viral       | 301 | SGVTFQ                                                      | 306 |
| Sbjct | 278  | GRTILGSALLEDEFTPFDDVVRQCSGVTFQ                               | 306  | SN50:A PDBID CH.. | 301 | SGVTFQ                                                      | 306 |

  

|                       |                                                                               |
|-----------------------|-------------------------------------------------------------------------------|
| Date of job execution | 2020-01-28                                                                    |
| Job identifier        | A202001286746803381A1F0E0DB47453E0216320D052666Q (jobs are stored for 7 days) |
| Running time          | 13.8 seconds                                                                  |
| Identical positions   | 294                                                                           |
| Identity              | 96.078%                                                                       |
| Similar positions     | 12                                                                            |
| Program               | CLUSTALO                                                                      |

Figure S1. Sequence alignment between SARS-CoV-2 3CL<sup>pro</sup> and SARS-CoV 3CL<sup>pro</sup>.

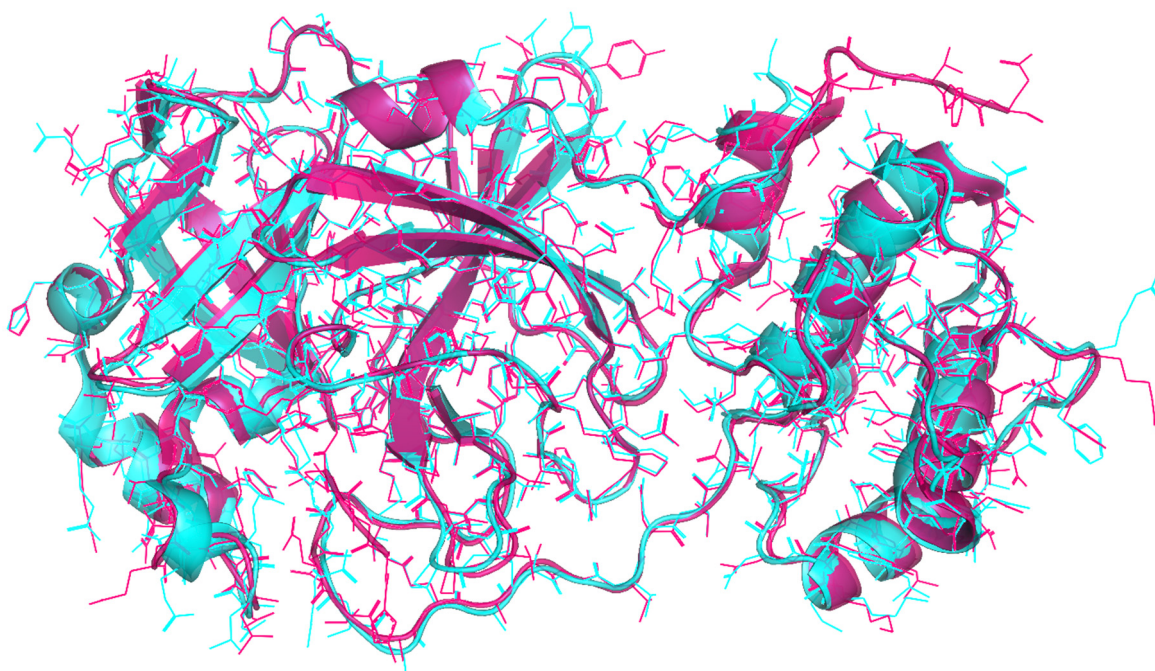

Figure S2. Structure superposition between SARS-CoV-2 3CL<sup>pro</sup> (PDB ID: 6LU7 shown in magenta) and SARS-CoV 3CL<sup>pro</sup> (PDB ID: 3D62 shown in cyan) with an RMSD of 0.44 Å.

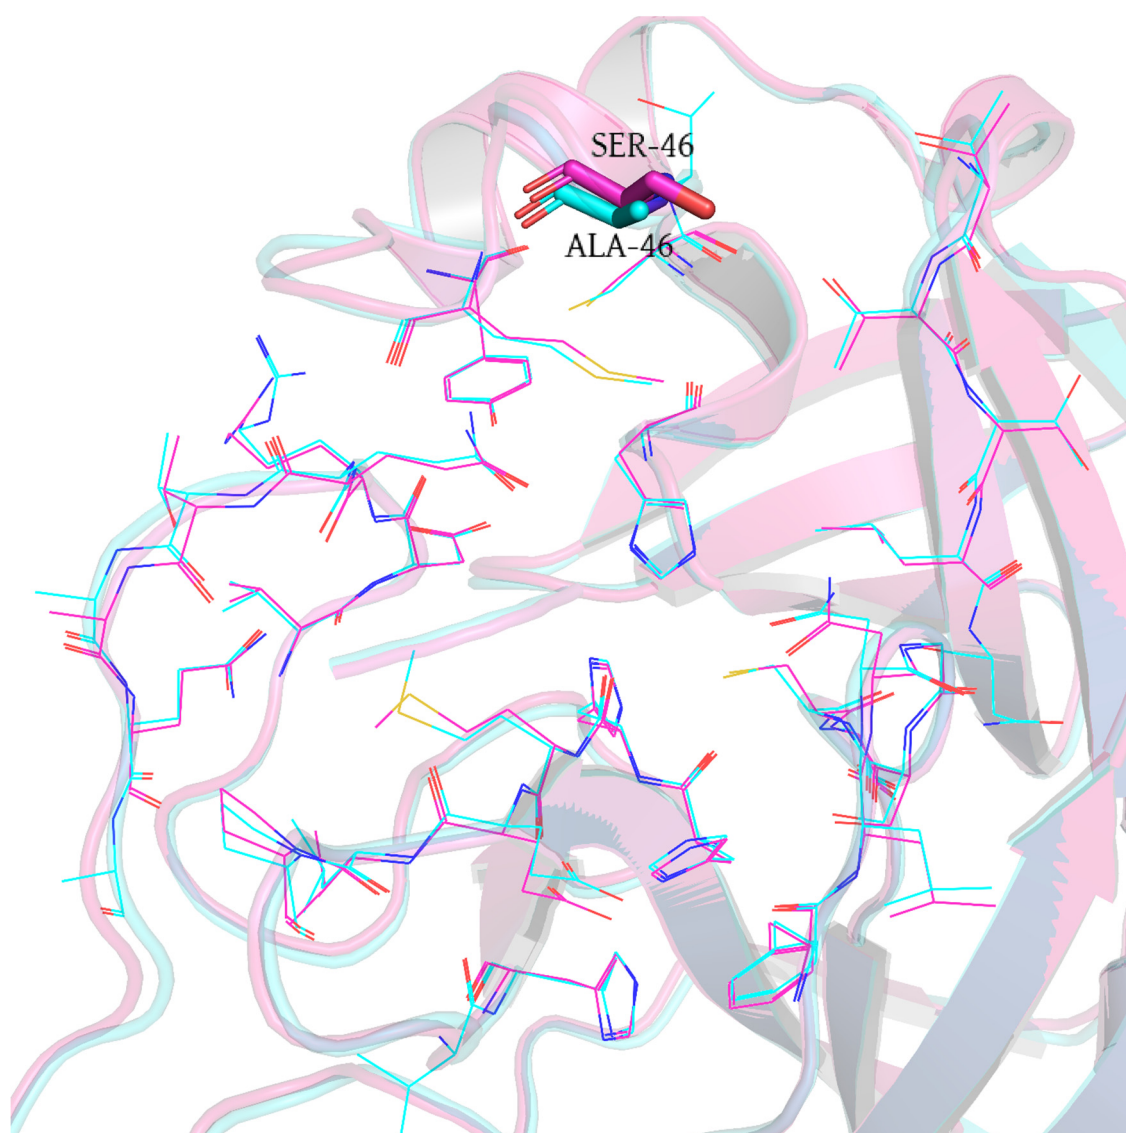

Figure S3. Substrate-binding site superimposition of SARS-CoV-2 3CL<sup>pro</sup> (PDB ID: 6LU7, magenta cartoon) and SARS-CoV 3CL<sup>pro</sup> (PDB ID: 2HOB, cyan cartoon). Amino acid residues in the 6Å range of the original molecular ligand N3 (SARS-CoV-2 3CL<sup>pro</sup>: lines in magentas, SARS-CoV 3CL<sup>pro</sup>: lines in cyan) are selected for comparative analysis, and only the residues at position 46 are different. The residue of SARS-CoV-2 3CL<sup>pro</sup> at position 46 is serine (shown with sticks in magentas), while alanine in SARS-CoV 3CL<sup>pro</sup> (shown with sticks in cyan).

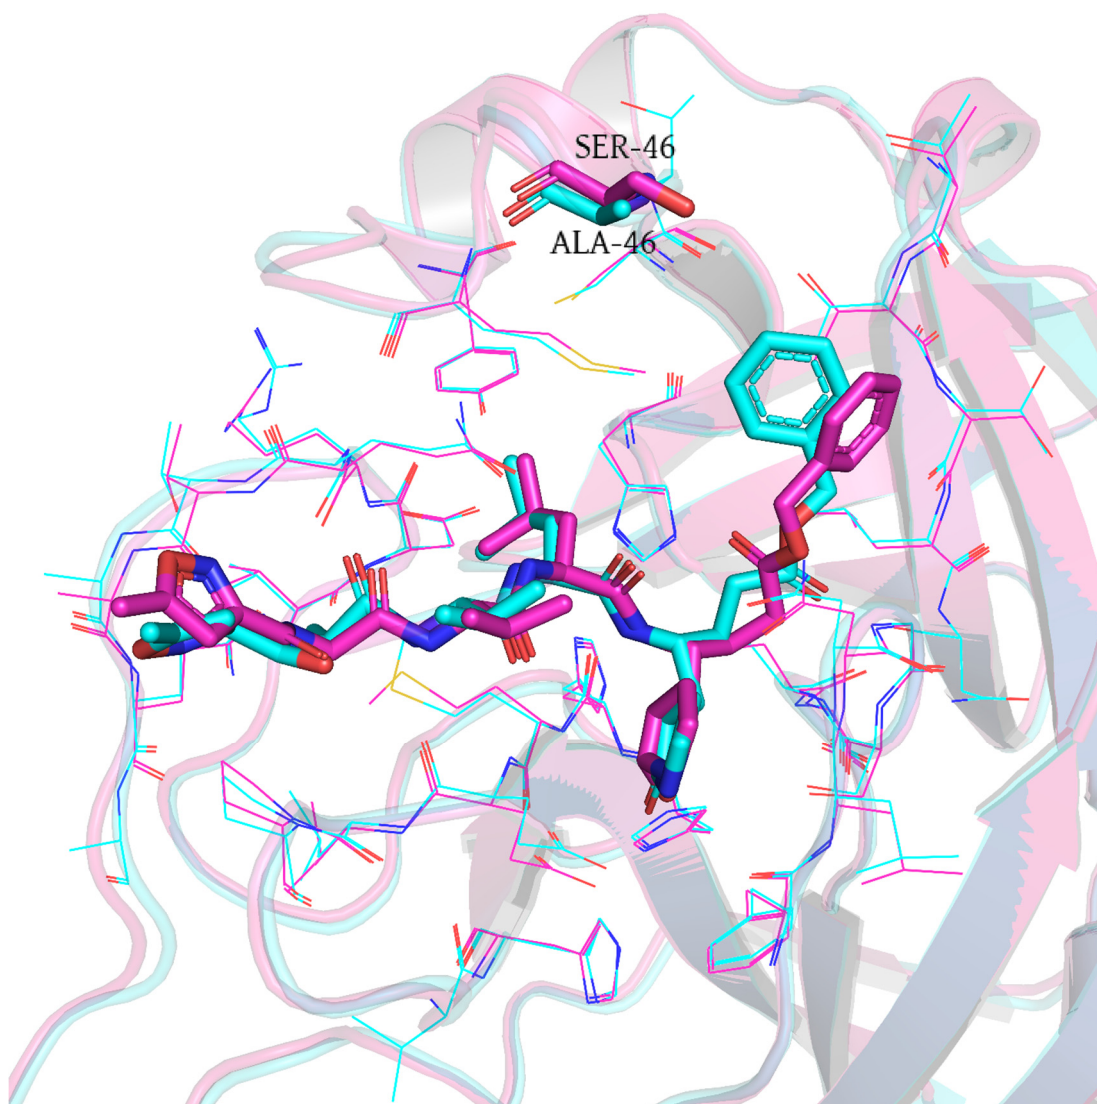

Figure S4. Comparison of the ligand conformations between SARS-CoV-2 3CL<sup>pro</sup> (PDB ID:6LU7) and SARS-CoV 3CL<sup>pro</sup> (PDB ID:2HOB). The ligand structure of SARS-CoV-2 3CL<sup>pro</sup> is shown with sticks in magenta, while the ligand of SARS-CoV 3CL<sup>pro</sup> is shown with sticks in cyan.

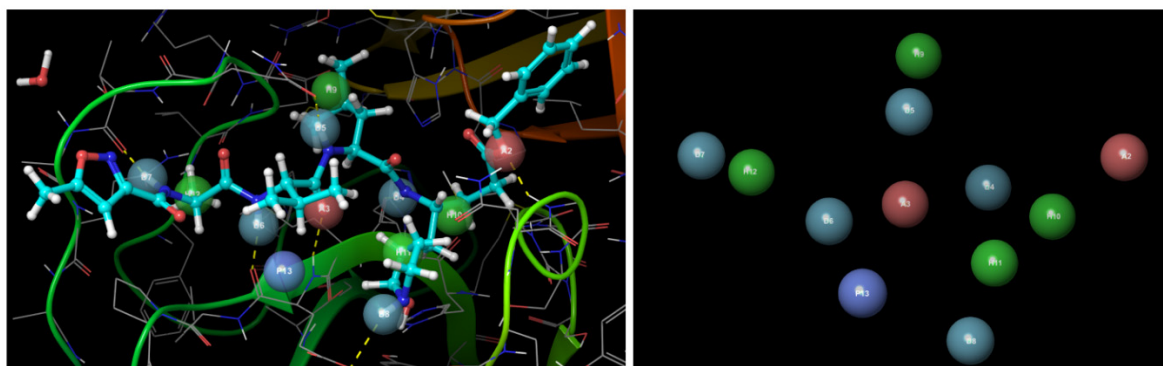

Figure S5. The pharmacophore model embedded in the *R* function. The pharmacophore consists of two hydrogen receptors (red spheres), five hydrogen donors (light blue spheres), four hydrophobic characteristics (green spheres) and a positive charge center (blue spheres).



Tables S1. Results of non-covalent and covalent docking results.

| ID | docking score | cdock affinity | KabschRmsd | StraightRmsd | SMILES                                                                                                             |
|----|---------------|----------------|------------|--------------|--------------------------------------------------------------------------------------------------------------------|
| 1  | -7.63         |                |            |              | N1CC[C@H](C1=O)N[C@H](C(=O)C=O)Cn2nnc(c23)ecce3Oe(c4ecce5)nc(c6c45)ecce6                                           |
| 2  | -7.743        | -5.464         | 2.752      | 9.245        | N1CC[C@H](C1=O)[C@H](C1=O)N[C@H](CC2)C(=O)/C=C/[C@H](C)(N)(C=O)c3ccc(o3)Cl)OCc(c4)ccc(c45)n(C)c(n5)C               |
| 3  | -6.802        | -6.374         | 2.381      | 6.455        | c1c[nH]jcc(c12)nc(n2)N[C@@]/(C=C/C=O)/C[C@H](C3=O)CCN3)c4e(O)c(c(o4)C=O)-c5c(Cl)cc(F)ec5                           |
| 4  | -6.807        | -6.102         | 2.491      | 8.626        | N1CC[C@H](C1=O)C[C@H](N)(C=C/C(=O)Nc(ccc2)(c22CCC=O)-n3nnc(c34)cccc4C[C@H](N)CC=O                                  |
| 5  | -8.739        | -8.171         | 4.254      | 8.37         | NC(=O)COC(=O)/C=C/[C@H](H)(N)(C)[C@H]1[C@H](O)c(c2cccc3)nc(c4c23)OC(=O)C@H(=O)N[C@H](C=O)N[C]C@H(C5=O)CCN5         |
| 6  | -8.772        | -6.262         | 4.314      | 9.295        | FCC(=O)c1ccc(o1)[C@@](N)(C)[C@@H](C2=O)CCN2)C=C/C(=O)N[C@H](C=O)[C@H](O)Cc(c3)sc(c34)ecccc4                        |
| 7  | -7.787        |                |            |              | N1CC[C@H](C1=O)N[C@H](C(=O)C=O)Cc2ccc(Cl)cc2                                                                       |
| 8  | -7.349        |                |            |              | O=CC(=O)[C@H](N)(C)C1ccnc(c12)c(c(CN)cc2)C[C@H](C3=O)CCN3                                                          |
| 9  | -8.874        | -7.388         | 1.473      | 1.734        | O=c1c(O)ccc(c12)ccc(c22O)NC(=N[H])c3c(CCC)cc(c3)N[C@H](N)/(C=C/C=O)/C[C@H](C4=O)CCN4                               |
| 10 | -8.967        | -4.159         | 2.393      | 11.36        | N1CC[C@H](C1=O)C[C@H](H)(N)C=C/C(=O)N(C)C(=O)[C@H](C)[C@H](c(s2)ccc2C=O)[C@H](H)[C@H](N)(C)C(C)C)c3cccc(c34)ecccc4 |
| 11 | -9.075        | -6.923         | 3.952      | 5.132        | N1CC[C@H](C1=O)C[C@H](N)/(C=C/C=O)c2c(ccc(s2)C=O)-c(n3)nc(c34)cn(C)ccc4N)[C@H](C)C5c[nH]N5                         |
| 12 | -7.256        | -5.275         | 3.352      | 7.935        | O=C/C=C/C[C@H](C)(N)C[C@H](C1=O)[C@H](OCC=O)CN1C(=O)[C@H](c2)ccc(c23)n(C(=O)C)cc3C(C)(C)c4)sc(c45)ecccc5           |
| 13 | -7.545        | -7.222         | 2.834      | 4.748        | N1CC[C@H](C1=O)C[C@H](N)/(C=C/C=O)N(C2=O)CCCN2c(cc3O)ccc(c34)ccc(c4=O)N[C@H](C=O)C                                 |
| 14 | -6.823        | -5.008         | 1.639      | 4.562        | s1ccc1l[C@@]/([C@H](N)(C)C=O)([C@H](C2=O)CCN2)c3ccc(cc3)C=C/C=O                                                    |
| 15 | -8.301        |                |            |              | N1CC[C@H](C1=O)N[C@H](C(=O)C=O)Cc2c3(CCCC3)cc(F)cc2Cl                                                              |
| 16 | -7.663        | -7.199         | 1.837      | 4.789        | N1CC[C@H](C1=O)N[C@H](C(=O)C(=O)O)Cc(c2)sc(c23)ecccc3                                                              |
| 17 | -6.766        | -5.437         | 3.614      | 4.207        | O=c(o1)oc(C)c1CN[C@H]/(C=C/C=O)/C[C@H](C2=O)CCN2)c3c(ccc(=O)o3)O)C@H]4CO[C@H]([C@H]45)OCC5                         |
| 18 | -7.404        |                |            |              | N1CC[C@H](C1=O)C[C@H](C=O)N(CC=O)[C@H](C(=O)C=O)Cc2cc(N)ccc2                                                       |
| 19 | -7.632        | -8.385         | 2.899      | 5.489        | N1CC[C@H](C1=O)C[C@H](N)/(C=C/C=O)[C@H](CC2)C[C@H]2([N](C)C)[C@H](C=O)[C@H](C)O)c(cc3=O)oc(c34)cc(O)cc4O           |
| 20 | -7.234        | -6.597         | 1.873      | 2.615        | N1CC[C@H](C1=O)N[C@H](C(=O)C(=O)O)Cc(c(c2=O)O)ccc(c23)c(O)c(O)cc3O                                                 |
| 21 | -8.133        | -6.518         | 1.907      | 8.581        | N1CC[C@H](C1=O)C[C@H](H)(N)C=C/C(=O)O[C@H]2CO[C@H]([C@H]23)O[C@H](C3)(NC(C)C)CC)N(C(=O)CC)c4cccc4                  |
| 22 | -7.2          | -7.392         | 4.657      | 6.777        | n1nccn1-c(s2)nc2C(=O)[C@H](C)[C@H](C3=O)CCN3)N[C@H](C=O)[C@H](O)(C=O)N(C@H)(C)(C)C=C/C=O                           |
| 23 | -7.625        | -6.972         | 2.61       | 7.52         | c1cccc(c12)c(=O)[nH]n(c2=O)[C@@](N)(C=C/C(=O)N[C@H](C(=O)O)CC)C[C@H](C3=O)C[C@H](N3)C[C@H](N)CC                    |
| 24 | -7.211        |                |            |              | O=CC(=O)[C@H](N)Cc(m1)nc(c12)C[C@H](N)(NC2)CCC[C@H](C3=O)CCN3                                                      |
| 25 | -8.133        |                |            |              | N1CC[C@H](C1=O)N[C@H](C(=O)C=O)Cc2c(O)c(Cl)ccc(Cl)c2Cl                                                             |
| 26 | -8.346        | -8.322         | 3.402      | 8.209        | C[C@H](H)(N)(C=O)NN(CCC(=O)N)C(=O)c(c12)[nH]cc1c1C[C@H](N)/(C=C/C=O)/C[C@H](C3=O)CCN3)cc2C[C@H](N)CC=O             |
| 27 | -7.308        |                |            |              | N1CC[C@H](C1=O)N[C@H](C(=O)C=O)Cc2ccc2                                                                             |
| 28 | -6.845        |                |            |              | s1ccc1C[C@H](C(=O)C=O)NCC[C@H](N)C[C@H](C2=O)CCN2                                                                  |
| 29 | -8.176        | -7.667         | 1.921      | 2.503        | CC(C)[C@H](B(O)N)Nc(s1)nc1C(=O)[C@H](N)CC(C(=O)[C@H](N)CC)C(=O)C/[C@H](N)C[C@H](C2=O)CCN2                          |
| 30 | -6.241        |                |            |              | C1CC1C[C@H](C(=O)C=O)N(C)C@H](C2=O)CCN2                                                                            |
| 31 | -6.502        |                |            |              | N1CC[C@H](C1=O)N[C@H](C(=O)C=O)CC2CCCC2                                                                            |
| 32 | -5.731        |                |            |              | O=CC(=O)[C@H](N)(C)[C@H](C1=O)C[C@H](C)(N)CC)N1[C@@H]2(OCC(C)C)CC[C@H](H)(O)CC2                                    |
| 33 | -7.246        |                |            |              | N1CC[C@H](C1=O)[C@H]2N[C@H](C)[C@H](N)(C=O)C=O[C[C@H](C)[C@H](H)23][C@H](SC)CCC3                                   |
| 34 | -5.337        |                |            |              | O=CC(=O)[C@H](N)(C)[C@H](C1=O)CCN1                                                                                 |
| 35 | -5.52         | -5.461         | 2.191      | 6.963        | C[C@H](N)(C=O)C(=O)NC(=O)/C=C/[C@H](N)C[C@H](C1=O)CCN1                                                             |
| 36 | -4.847        |                |            |              | O=CC(=O)N(C)(C)NC(=O)[C@H](CC(C)C)N(C@H)(C1=O)CCN1                                                                 |
| 37 | -7.325        | -5.179         | 1.83       | 2.911        | O=CC(=O)[C@H](N)(C(=O)C=O)/C=C/[C@H](N)C[C@H](C1=O)CCN1                                                            |
| 38 | -6.459        |                |            |              | O=CC(=O)[C@H](N)(C@H)(N)[C@H](H)1[C@H](H)(C2=O)CCN2)N[C@H](N1)N(C)C                                                |
| 39 | -7.998        | -6.302         | 3.796      | 9.2          | n1cc(C)nc1C(=O)N[C@H](C)[C@H](C2=O)CCN2)C=C/C(=O)O)nc(c3c45)ecccc3)c4cc(cc5)-c6ccc([N+])([O-])                     |

Several lead compounds do not have the covalent docking results as their reactive group is in an unsuitable direction to 145CYS. All RMSD values are heavy atoms based. The unity is kcal/mol

KabschRmsd: Root-mean-square deviation (RMSD) is calculated with the Kabsch algorithm (1976) doi: <http://dx.doi.org/10.1107/S0567739476001873>).

**StraightRmsd:** Root-mean-square deviation (RMSD) is calculated directly from the atomic coordinates without superimposing the atoms.

The unity for Both RMSD is Å



|                                                                                                                        |
|------------------------------------------------------------------------------------------------------------------------|
| <chem>[\$([c;\$(c:[c,n,o,s]):[n,o,s]):1]-;![@](\$([c;\$(c:[c,n,o,s]):[n,o,s]):2)&gt;&gt;[14*]-[*:1].[14*]-[*:2]</chem> |
| <chem>[\$([c;\$(c:[c,n,o,s]):[n,o,s]):1]-;![@](\$([C;\$(C(-;@C)-;@C)):2)&gt;&gt;[14*]-[*:1].[15*]-[*:2]</chem>         |
| <chem>[\$([c;\$(c:[c,n,o,s]):[n,o,s]):1]-;![@](\$([c;\$(c(c):c)):2)&gt;&gt;[14*]-[*:1].[16*]-[*:2]</chem>              |
| <chem>[\$([C;\$(C(-;@C)-;@C)):1]-;![@](\$([c;\$(c(c):c)):2)&gt;&gt;[15*]-[*:1].[16*]-[*:2]</chem>                      |
| <chem>[\$([c;\$(c(c):c)):1]-;![@](\$([c;\$(c(c):c)):2)&gt;&gt;[16*]-[*:1].[16*]-[*:2]</chem>                           |

Note, a reaction definition is based on the SMILES arbitrary target specification (SMARTS), which is a chemical language for describing molecular patterns. We also use the same reaction type for adding fragments, except with the reverse reaction.

Table S3. Five clusters for the generative 47 leads

| Cluster | Name | Structure                                                                           | SMILES                                                                | Canvas Mean Shape Similarity |
|---------|------|-------------------------------------------------------------------------------------|-----------------------------------------------------------------------|------------------------------|
| 1       | 25   | 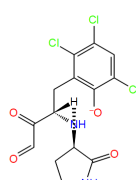  | <chem>N1CC[C@H](C1=O)N[C@H](C(=O)C=O)Cc2c([O-])c(Cl)cc(Cl)c2Cl</chem> | 0.001                        |
|         | 27   |  | <chem>N1CC[C@H](C1=O)N[C@H](C(=O)C=O)Cc2cccs2</chem>                  | 0.001                        |
|         | 7    |  | <chem>N1CC[C@H](C1=O)N[C@H](C(=O)C=O)Cc2ccc(Cl)cc2</chem>             | 0.001                        |
|         | 31   |  | <chem>N1CC[C@H](C1=O)N[C@H](C(=O)C=O)CC2CCCC2</chem>                  | 0.001                        |
|         | 47   |  | <chem>O=CC(=O)[C@H](C)N[C@@H](C1=O)CCN1</chem>                        | 0.001                        |

|   |    |                                                                                     |                                                                                                     |       |
|---|----|-------------------------------------------------------------------------------------|-----------------------------------------------------------------------------------------------------|-------|
|   | 30 | 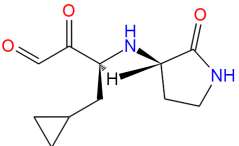   | <chem>C1CC1C[C@@H](C(=O)C=O)N[C@@H](C2=O)CCN2</chem>                                                | 0.001 |
|   | 43 |    | <chem>O=CC(=O)[C@H](C[NH3+])N[C@@H](C1=O)CCN1</chem>                                                | 0.001 |
| 2 | 36 |    | <chem>O=CC(=O)[C@H](C)NC(=O)[C@H](CC(C)C)[NH2+][C@@H](C1=O)CCN1</chem>                              | 0.002 |
|   | 15 |   | <chem>N1CC[C@H](C1=O)N[C@H](C(=O)C=O)Cc2c(C3CCC3)cc(F)cc2Cl</chem>                                  | 0.002 |
|   | 34 |  | <chem>O=CC(=O)[C@@H](N)C[C@@H](C1=O)CCN1</chem>                                                     | 0.002 |
| 3 | 32 |  | <chem>O=CC(=O)[C@@H](N)C[C@@H](C1=O)C[C@@H](C[C@H]([NH3+])CC)N1[C@@]2(OCC(C)C)CC[C@@H](O)CC2</chem> | 0.003 |
|   | 8  |  | <chem>O=CC(=O)[C@H](N)Cc1ccnc(c12)c(c(C[NH3+])cc2)C[C@H](C3=O)CCN3</chem>                           | 0.003 |
|   | 1  |  | <chem>N1CC[C@H](C1=O)N[C@H](C(=O)C=O)Cn2nnc(c23)cccc3Oc(c4cccc5)nc(c6c45)cccc6</chem>               | 0.003 |

|    |                                                                                     |                                                                                                |       |
|----|-------------------------------------------------------------------------------------|------------------------------------------------------------------------------------------------|-------|
| 28 | 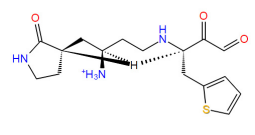   | <chem>s1cccc1C[C@@H](C(=O)C=O)NC</chem><br><chem>C[C@@H]([NH3+])C[C@@H](C2=O)CCN2</chem>       | 0.003 |
| 18 |    | <chem>N1CC[C@H](C1=O)C[C@@H](C=O)N(CC=O)[C@H](C(=O)C=O)C</chem><br><chem>c2cc(N)ccc2</chem>    | 0.003 |
| 24 |    | <chem>O=CC(=O)[C@@H](N)Cc1nnc1n(c12)C[C@@]([NH3+])(NC2)CCC[C@@H](C3=O)CCN3</chem>              | 0.003 |
| 14 |   | <chem>s1cccc1[C@@]([C@H](N)C(=O)C=O)([C@@H](C2=O)CCN2)c3ccc(C=C\C=O</chem>                     | 0.003 |
| 33 |  | <chem>N1CC[C@H](C1=O)[C@H]2[NH2+][C@H](C[C@H](N)C(=O)C=O)C[C@@H]([C@@H]23)[C@H](SC)CCC3</chem> | 0.003 |
| 37 |  | <chem>O=CC(=O)[C@H](C)N(C(=O)C(=O)/C=C/[C@H](N)C[C@@H](C1=O)CCN1</chem>                        | 0.003 |
| 16 |  | <chem>N1CC[C@H](C1=O)[NH2+][C@H](C(=O)C([O-])=O)Cc2sc(c23)ccc3</chem>                          | 0.003 |
| 35 |  | <chem>C[C@H](N)C(=O)C(=O)NC(=O)/C=C/[C@H](N)C[C@@H](C1=O)CCN1</chem>                           | 0.003 |



|   |    |                                                                                     |                                                                                                                 |       |
|---|----|-------------------------------------------------------------------------------------|-----------------------------------------------------------------------------------------------------------------|-------|
|   | 38 | 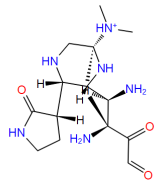   | <chem>O=CC(=O)[C@@H](N)[C@H](N)[C@@H]1[C@H]([C@@H](C2=O)CCN2)NC[C@@H](N1)[NH+](C)C</chem>                       | 0.003 |
| 4 | 44 |    | <chem>s1cccc1C(=O)N([C@](C)(/C=C/C=O)[C@@H](C2=O)CCN2)c([nH]n3)c3Nc(on4)c([N+][O-])=O)c4C</chem>                | 0.004 |
|   | 17 |    | <chem>O=c(o1)oc(C)c1CN[C@](C)(/C=C/C=O)(C[C@@H](C2=O)CCN2)c3c(ccc(=O)o3)O[C@H]4CO[C@H]([C@H]45)OCC5</chem>      | 0.004 |
|   | 3  |   | <chem>c1nccc(c12)[nH]c(n2)N[C@@](C)(/C=C/C=O)(C[C@@H](C3=O)CCN3)c4c([O-])c(c(o4)C=O)-c5c(Cl)cc(F)cc5</chem>     | 0.004 |
|   | 42 |  | <chem>c1cccc1\C=C\C(=O)N([C@@H](\C=C\C=O)C[C@@H](C2=O)CCN2)[C@H]([C@@H](O)C[C@H](C=O)C)c3c(F)cc(F)c(F)c3</chem> | 0.004 |
|   | 22 |  | <chem>n1nccn1-c(c(s2)nc2C(=O)[C@H](C[C@@H](C3=O)CCN3)N[C@H](C=O)[C@H](O)C(=O)N[C@@H](C)\C=C\C=O</chem>          | 0.004 |
|   | 40 |  | <chem>n1ccncc1C(=O)N[C@H](\C=C\C=O)[C@](C)[C@@H](C2=O)CCN2)(c3cccc3)Oc(c4cccc5)nc(c6c45)cccc6</chem>            | 0.004 |
|   | 20 |  | <chem>N1CC[C@H](C1=O)[NH2+][C@H](C(=O)C([O-])=O)Cc(c(c2=O)O)oc(c23)c(O)c(O)cc3O</chem>                          | 0.004 |

|   |    |                                                                                     |                                                                                                                            |       |
|---|----|-------------------------------------------------------------------------------------|----------------------------------------------------------------------------------------------------------------------------|-------|
| 5 | 2  | 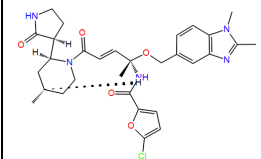   | <chem>N1CC[C@H](C1=O)[C@H](C[C@H]2C)N(CC2)C(=O)/C=C/[C@@](C)(NC(=O)c3ccc(o3)Cl)OCc(c4)cc(c45)n(C)c(n5)C</chem>             | 0.005 |
|   | 12 |    | <chem>O=C/C=C/[C@](C)(N)[C@@H](C1=O)[C@H](OCC=O)CN1C(=O)[C@@H](c(c2)ccc(c23)n(C(=O)C)c3)C(C)(C)c(c4)sc(c45)cccc5</chem>    | 0.005 |
|   | 11 |    | <chem>N1CC[C@H](C1=O)C[C@@](N)(/C=C/C=O)c2c(cc(s2)C=O)-c([nH]3)nc(c34)c[n+](C)cc4N[C@](C=O)(C)c5c[nH+]c[nH]5</chem>        | 0.005 |
|   | 45 |   | <chem>Cc1onc(C)c1-c(cco2)c2/C=C(\C=O)NC(=O)/C=C/[C@H](C[C@@H](C3=O)CCN3)NC(=O)N[C@H](C=O)C</chem>                          | 0.005 |
|   | 39 |  | <chem>n1cc(C)ncc1C(=O)N[C@H](C[C@@H](C2=O)CCN2)\C=C(\C=O)Oc(nc(c3c45)cccc3)c4cc(cc5)-c6ccc([N+](O-)=O)cc6</chem>           | 0.005 |
|   | 5  |  | <chem>NC(=O)COC(=O)/C=C/[C@@H](N)C[C@H]1[C@H](Oc(c2cccc3)nc(c4c23)cccc4)OC(=O)[C@@]1([C@@H](C=O)N)C[C@@H](C5=O)CCN5</chem> | 0.005 |
|   | 46 |  | <chem>n1n[nH]cc1N([C@@H](C)CCC=O)C(=O)[C@@H]([C@H](C)C[C@@H](C2=O)CCN2)c(cc3=O)oc(c34)cc(O)cc4O</chem>                     | 0.005 |

|    |                                                                                     |                                                                                                                                   |       |
|----|-------------------------------------------------------------------------------------|-----------------------------------------------------------------------------------------------------------------------------------|-------|
| 10 | 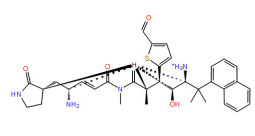   | <chem>N1CC[C@H](C1=O)C[C@@H](N)C=C\C(=O)N(C)C(=O)[C@H](C)[C@@H](c(s2)ccc2C=O)[C@H](O)[C@@H]([NH3+])C(C)(C)c3cccc(c34)cccc4</chem> | 0.005 |
| 21 |    | <chem>N1CC[C@H](C1=O)C[C@@H]([NH3+])C=C\C(=O)O[C@H]2CO[C@H]([C@H]23)O[C@](C3)(NC(C)(C)CC)N(C(=O)CC)c4cccc4</chem>                 | 0.005 |
| 9  |    | <chem>[OH+]=c1c(O)coc(c12)cc(cc2O)NC(=[NH2+])c3c(CCC)cc(cc3)N[C@]([NH3+])/(C=C/C=O)C[C@@H](C4=O)CCN4</chem>                       | 0.005 |
| 13 |   | <chem>N1CC[C@H](C1=O)C[C@](N)/C=C/C=O)N(C2=O)CCCN2c(cc3O)c(c34)occ(c4=O)N[C@H](C=O)C</chem>                                       | 0.005 |
| 23 |  | <chem>CC[C@@H](C([O-])=O)NC(=O)/C=C/[C@]([NH3+])(n([n-]c1=O)c(=O)c(c12)cccc2)C[C@@H](C3=O)C[C@@H](N3)C[C@H]([NH3+])C</chem>       | 0.005 |
| 29 |  | <chem>CC(C)C[C@@H](B(O)O)Nc(cs1)nc1C(=O)[C@H](C)N(C(=O)[C@@H]([NH3+])CC)C(=O)/C=C/[C@@H](N)C[C@H](C2=O)CCN2</chem>                | 0.005 |
| 19 |  | <chem>N1CC[C@H](C1=O)C[C@]([NH3+])/(C=C/C=O)[C@H](CC2)C[C@]2(N[C@H](C=O)[C@@H](C)O)c(cc3=O)oc(c34)cc(O)cc4O</chem>                | 0.005 |
| 26 |  | <chem>C[C@H]([NH3+])C(=O)NN(CCC(=O)N)C(=O)c(c12)[nH]cc1)c(C[C@@]([NH3+])/(C=C/C=O)[C@@H](C3=O)CCN3)cc2C[C@@H]([NH3+])CC=O</chem>  | 0.005 |

|  |    |                                                                                   |                                                                                                               |       |
|--|----|-----------------------------------------------------------------------------------|---------------------------------------------------------------------------------------------------------------|-------|
|  | 4  | 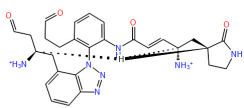 | <chem>N1CC[C@H](C1=O)C[C@H]([NH3+])C=C(C(=O)Nc2cc2)c(c2CCC=O)-n3nnc(c34)cccc4C[C@@H]([NH3+])CC=O</chem>       | 0.005 |
|  | 41 |  | <chem>c1cccc1O[C@@](C)(/C=C/C=O)NC(=O)[C@@H](c2cccn2)[C@H](C)C[C@@H](C3=O)CCN3c4nccs4</chem>                  | 0.005 |
|  | 6  |  | <chem>FCC(=O)c1ccc(o1)[C@@]([NH3+])(C[C@@H](C2=O)CCN2)\C=C\C(=O)N[C@H](C=O)[C@@H](O)Cc(c3)sc(c34)cccc4</chem> | 0.005 |
